# Supplementary material for: Field-level clothianidin exposure affects bumblebees but generally not their pathogens
Source: PubMed Central journal article supplement (PMC6303475; doi:10.1038/s41467-018-07914-3), 2018-12-21
Supplement: 41467_2018_7914_MOESM1_ESM.pdf [file 41467_2018_7914_MOESM1_ESM.pdf]

**Supplementary Information for**  
**Field-level clothianidin exposure affects bumblebees but generally not their**  
**pathogens**

**Wintermantel *et al.***

Correspondence to: [dywintermantel@gmail.com](mailto:dywintermantel@gmail.com)

**This PDF file includes:**

Supplementary Figure 1

Supplementary Tables 1-4

Supplementary References

## Supplementary Figures

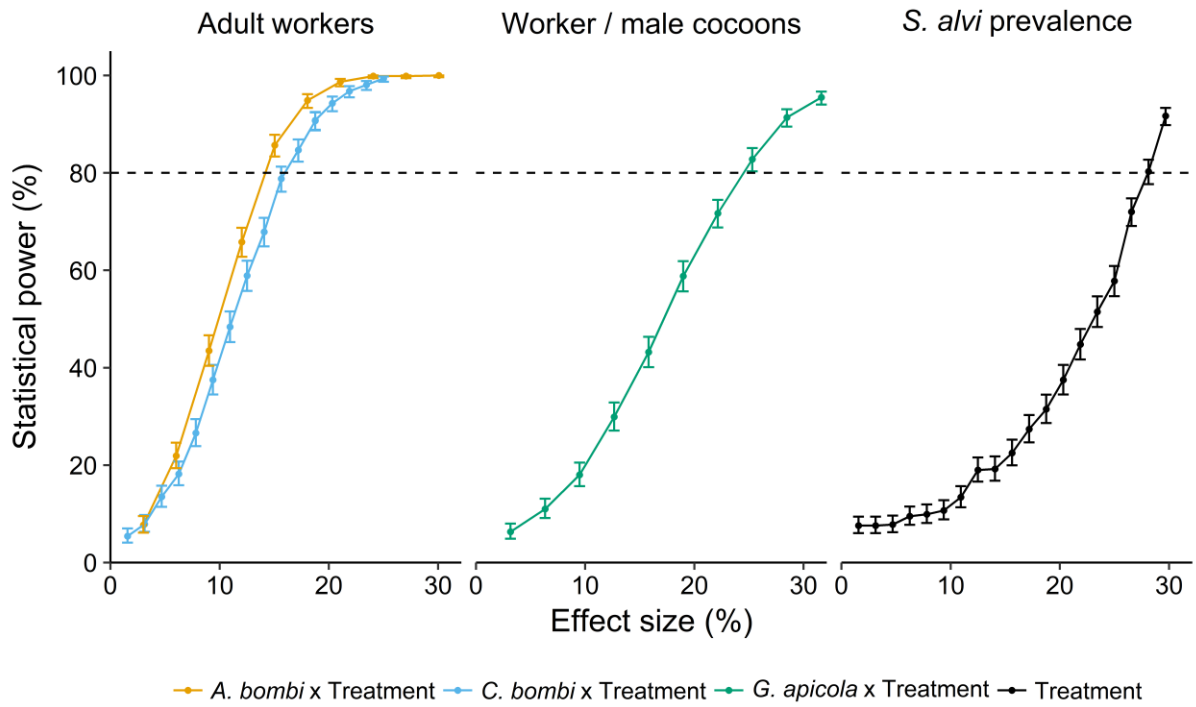

**Supplementary Figure 1 | Statistical power.** Power in relation to effect size for treatment effects or interactive effects between treatment and microorganism abundance where  $0.05 < P < 0.1$ . For interactive effects on the numbers of adult workers and worker/male cocoons, effect size represents the effect of a  $\log_{10}$  unit increase in microorganism abundance expressed as a percentage of the estimated value of a control colony with average microorganism  $\log_{10}$  abundance. For *S. alvi* prevalence effect size represents an increase in the number of infected colonies illustrated as a percentage of all colonies. The dashed line indicates a power of 80%.

## Supplementary Tables

**Supplementary Table 1 | Microorganism prevalence.** The prevalences of detected microbiota in adult worker bees were related to clothianidin seed treatment using two different kinds of tests: tests of equal proportions for straight comparisons of the proportions of infected colonies between treatments and analyses of variance (ANOVA) based on the number of infected colonies per field to control for non-independence of colonies placed by the same field.

| Response                         | Predictor | Test                           | Estimate <sup>c</sup> | $\chi^2_1$ | <i>P</i> <sup>d</sup> |
|----------------------------------|-----------|--------------------------------|-----------------------|------------|-----------------------|
| <i>Acute bee paralysis virus</i> | Treatment | Equal proportions <sup>a</sup> | -9.4%                 | 0.87       | 0.352                 |
| <i>Slow bee paralysis virus</i>  | Treatment | Equal proportions <sup>a</sup> | 6.3%                  | 1.84       | 0.668                 |
| <i>Sacbrood virus</i>            | Treatment | LRT on GLMM <sup>b</sup>       | 12.2%                 | 1.74       | 0.189                 |
| <i>Apicystis bombi</i>           | Treatment | LRT on GLMM <sup>b</sup>       | -14.7%                | 0.71       | 0.400                 |
| <i>Crithidia bombi</i>           | Treatment | LRT on GLMM <sup>b</sup>       | -20.8%                | 4.33       | <b>0.037</b>          |
| <i>Nosema bombi</i>              | Treatment | Equal proportions <sup>a</sup> | -9.4%                 | 0.87       | 0.352                 |
| <i>Gilliamella apicola</i>       | Treatment | Equal proportions <sup>a</sup> | 0%                    | 0          | 1                     |
| <i>Snodgrassella alvi</i>        | Treatment | LRT on GLMM <sup>b</sup>       | 23.8%                 | 3.63       | 0.057                 |

<sup>a</sup> Two-sided test of equal proportions using the prop.test function in R

<sup>b</sup> Likelihood ratio test on a generalized linear mixed effects model with field identity as random effect.

<sup>c</sup> Effect sizes are expressed as absolute differences between treatments in the percentage of infected colonies.

<sup>d</sup> *P*-values < 0.05 are highlighted in bold

**Supplementary Table 2 | Microorganism abundance.** Log<sub>10</sub> abundance of prevalent microorganisms in worker bees of infected colonies (i.e. excluding colonies in which the target organism was not detected) in relation to clothianidin seed treatment <sup>a</sup>.

| Response          | Predictor | Estimate (log <sub>10</sub> units) | Estimate (%) <sup>a</sup> | $\chi^2_1$ | <i>P</i> <sup>b</sup> | N Fields | N Colonies |
|-------------------|-----------|------------------------------------|---------------------------|------------|-----------------------|----------|------------|
| <i>A. bombi</i>   | Treatment | 1.09                               | 24.5                      | 2.39       | 0.122                 | 15       | 40         |
| <i>C. bombi</i>   | Treatment | - 0.68                             | - 11.3                    | 2.70       | 0.100                 | 16       | 53         |
| <i>G. apicola</i> | Treatment | 0.28                               | 5.39                      | 1.39       | 0.239                 | 16       | 58         |
| <i>S. alvi</i>    | Treatment | 0.05                               | 1.10                      | 0.13       | 0.720                 | 16       | 50         |

<sup>a</sup> Effect sizes in % were calculated in reference to the control group

<sup>b</sup> *P*-values were calculated by likelihood ratio tests with 1 degree of freedom on linear mixed effects models containing field identity and field pair identity as random factors.

**Supplementary Table 3 | Primers.** Forward (F) and reverse (R) primers used in RNA/DNA assays with a literature reference to previous usage.

| Target                                               | Primers                                  | Sequence '5-'3                                     |
|------------------------------------------------------|------------------------------------------|----------------------------------------------------|
| <i>Acute bee paralysis virus</i> <sup>1</sup>        | ABPV-F6548 (F)<br>KIABPV-B6707 (R)       | TCATACCTGCCGATCAAG<br>CTGAATAATACTGTGCGTATC        |
| <i>Black queen cell virus</i> <sup>1</sup>           | BQCV-qF7893 (F)<br>BQCV-qB8150 (R)       | AGTGGCGGAGATGTATGC<br>GGAGGTGAAGTGGCTATATC         |
| <i>Chronic bee paralysis virus</i> <sup>1</sup>      | CBPV1-qF1818 (F)<br>CBPV1-qB2077 (R)     | CAACCTGCCTCAACACAG<br>AATCTGGCAAGGTTGACTGG         |
| <i>Deformed wing virus</i> <sup>1</sup>              | DWV-F8668 (F)<br>DWV-B8757 (R)           | TTCATTAAAGCCACCTGGAACATC<br>TTTCCTCATTAAGTGTGTCG   |
| <i>Lake Sinai Virus type-1</i> <sup>1</sup>          | qLSV1-F2569 (F)<br>qLSV1-R2743 (R)       | AGAGGTTGCACGGCAGCATG<br>GGGACGCAGCACGATGCTCA       |
| <i>Lake Sinai virus type-2</i> <sup>1</sup>          | qLSV2-F1722 (F)<br>qLSV2-R1947 (R)       | CGTGCTGAGGCCACGGTTGT<br>GCGGTGTCGATCTCGCGGAC       |
| <i>RNA250</i> <sup>2</sup>                           | RNA250 (F)<br>RNA250 (R)                 | TGGTGCCTGGGCGGTAAAG<br>TGCGGGGACTCACTGGCTG         |
| <i>Bt-RPL23</i> <sup>3</sup>                         | Bt-RPL23 (F)<br>Bt-RPL23 (R)             | GGGAAAACCTGAACTTAGGAAAA<br>ACCCTTTCATTTCTCCCTTGTTA |
| <i>Slow bee paralysis virus</i> <sup>4</sup>         | SBPV-F3177 (F)<br>SBPV-B3363 (R)         | GCGCTTTAGTTCAATTGCC<br>ATTATAGGACGTGAAAATATAC      |
| <i>Sacbrood virus</i> <sup>1</sup>                   | SBV-qF3164 (F)<br>SBV-qB3461 (R)         | GCTCTAACCTCGCATCAAC<br>TTGGAACCTACGCATTCTCTG       |
| <i>Apis mellifera filamentous virus</i> <sup>5</sup> | AmFV-BroN (F)<br>AmFV-BroN (R)           | TTATTAACACCCGAGGCTTC<br>CATGGTGCCAAGTCTTGCT        |
| <i>Gregarine spp.</i> <sup>6, b</sup>                | Gregarine (F)<br>Gregarine (R)           | CCAGCATGGAATAACATGTAAGG<br>GACAGCTTCCAATCTCTAGTCG  |
| <i>Crithidia bombi</i> <sup>a, b</sup>               | Cbombi-GADH-F2 (F)<br>Cbombi-GADH-R2 (R) | CAAGAGCTCGCCGGGT<br>GGACGCGTTCGACACC               |
| <i>Nosema apis</i> <sup>7</sup>                      | Napis-qF3 (F)<br>NosUniv-qR3 (R)         | TAGTATATTTGAATATTTGTTTACAATGG<br>CGCTATGATCGCTTGCC |
| <i>Nosema ceranae</i> <sup>a, b</sup>                | Nceranae-qF3 (F)<br>NosUniv-qR3 (R)      | GTATGTTTGAATAATTTATTTATTG<br>CGCTATGATCGCTTGCC     |
| <i>Nosema bombi</i> <sup>a, b</sup>                  | Nbombi-qF3 (F)<br>NosUniv-qR3 (R)        | TAGTATGTTTGAATATTTATTTATTACGA<br>CGCTATGATCGCTTGCC |
| <i>Gilliamella apicola</i> <sup>a, b</sup>           | Gilliam 16S (F)<br>Gilliam 16S (R)       | GTAACATGAGTGCTTGCCT<br>CGCATGGCCCAAGG              |
| <i>Snodgrassella alvi</i> <sup>a, b</sup>            | Snodgras 16S (F)<br>Snodgras 16S (R)     | ACGGAGAGCTTGCTCTC<br>AAATAACGCGAGGTCTTTCCGA        |

<sup>a</sup> The primers were first used in this study.

<sup>b</sup> Identity of target organism confirmed by bidirectional Sanger sequencing of selected PCR products. In all cases, the PCR product sequences matched 100% with the intended target.

**Supplementary Table 4 | Data analysis excluding the Biscaya sprayed field.** Tests that resulted in a change of the level of significance (based on  $\alpha = 0.05$ ) if the field that was sprayed with Biscaya (containing thiacloprid) was removed from the data analysis.

| Response                          | Predictor              | Sample                          | Estimate | $\chi^2_1$ | $P^a$        |
|-----------------------------------|------------------------|---------------------------------|----------|------------|--------------|
| <i>Crithidia bombi</i> prevalence | Treatment              | All colonies                    | -20.8%   | 4.33       | <b>0.037</b> |
| <i>Crithidia bombi</i> prevalence | Treatment              | Excluding Biscaya sprayed field | -20.1%   | 3.63       | 0.057        |
| Worker/male cocoons               | <i>Apicystis bombi</i> | All colonies                    | -8.946   | 3.70       | 0.054        |
| Worker/male cocoons               | <i>Apicystis bombi</i> | Excluding Biscaya sprayed field | -14.174  | 5.08       | <b>0.024</b> |

<sup>a</sup>  $P$ -values are based on likelihood ratio test on a generalized linear mixed effects model with field identity as random effect.

### Supplementary References

1. Locke, B., Forsgren, E., Fries, I. & de Miranda, J. R. Acaricide treatment affects viral dynamics in *Varroa destructor*-infested honey bee colonies via both host physiology and mite control. *Appl. Environ. Microbiol.* **78**, 227–235 (2012).
2. Mondet, F., de Miranda, J. R., Kretzschmar, A., Le Conte, Y. & Mercer, A. R. On the Front Line: Quantitative Virus Dynamics in Honeybee (*Apis mellifera* L.) Colonies along a New Expansion Front of the Parasite *Varroa destructor*. *PLoS Pathog.* **10**, e1004323 (2014).
3. Niu, J., Cappelle, K., de Miranda, J. R., Smagghe, G. & Meeus, I. Analysis of reference gene stability after Israeli acute paralysis virus infection in bumblebees *Bombus terrestris*. *J. Invertebr. Pathol.* **115**, 76–79 (2014).
4. de Miranda, J. R. *et al.* Genetic characterization of slow bee paralysis virus of the honeybee (*Apis mellifera* L.). *J. Gen. Virol.* **91**, 2524–2530 (2010).
5. Hartmann, U., Forsgren, E., Charrière, J. D., Neumann, P. & Gauthier, L. Dynamics of *Apis mellifera* filamentous virus (AmFV) infections in honey bees and relationships with other parasites. *Viruses* **7**, 2654–2667 (2015).
6. Meeus, I., De Graaf, D. C., Jans, K. & Smagghe, G. Multiplex PCR detection of slowly-evolving trypanosomatids and neogregarines in bumblebees using broad-range primers. *J. Appl. Microbiol.* **109**, 107–115 (2010).
7. Forsgren, E. & Fries, I. Comparative virulence of *Nosema ceranae* and *Nosema apis* in individual European honey bees. *Vet. Parasitol.* **170**, 212–217 (2010).
